# Supplementary material for: CircMTO1 suppresses hepatocellular carcinoma progression via the miR-541-5p/ZIC1 axis by regulating Wnt/β-catenin signaling pathway and epithelial-to-mesenchymal transition
Source: PubMed Central journal article supplement (PMC8688446; doi:10.1038/s41419-021-04464-3), 2021-12-20
Supplement: 41419_2021_4464_MOESM8_ESM.pdf [file 41419_2021_4464_MOESM8_ESM.pdf]

Please complete the table below to indicate the contributions of all named authors to the figures.

Figure 1:

Dandan Li and Jiawei Zhang

Figure 2:

Dandan Li and Jiawei Zhang

Figure 3:

Jing Yang and Jie Wang

Figure 4:

Jie Wang and Runling Zhang

Figure 5:

Jinming Li and Dandan Li

Figure 6:

Jinming Li and Rui Zhang

Signed for and on behalf of the Author(s):

Print Name:

Date:

Jinming Li

Jinming Li

2021.11.11
